# Supplementary material for: Hunting in archerfish – an ecological perspective on a remarkable combination of skills
Source: Oxford University Press journal article supplement (doi:10.1242/jeb.159723), 2018-12-10
Supplement: jeb159723supp.pdf [file jeb159723supp.pdf]

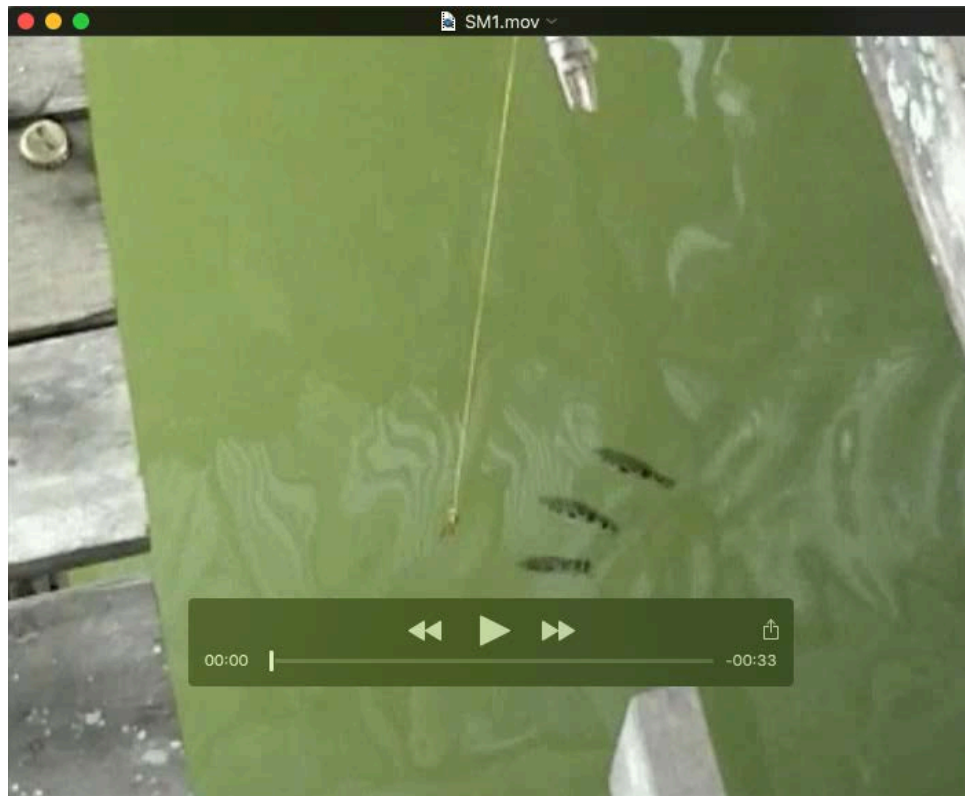

**Movie 1.** A group of wild archerfish engage a target placed at a height of 25 cm above the water surface. Note successful shots and jumps despite water current (e.g. see floating bubbles arrowed at the end of the recording). Recording in the wild close to Chumphon, Thailand. (Recording: J. Eisenhut, N. Reyer and A. Walenta.)

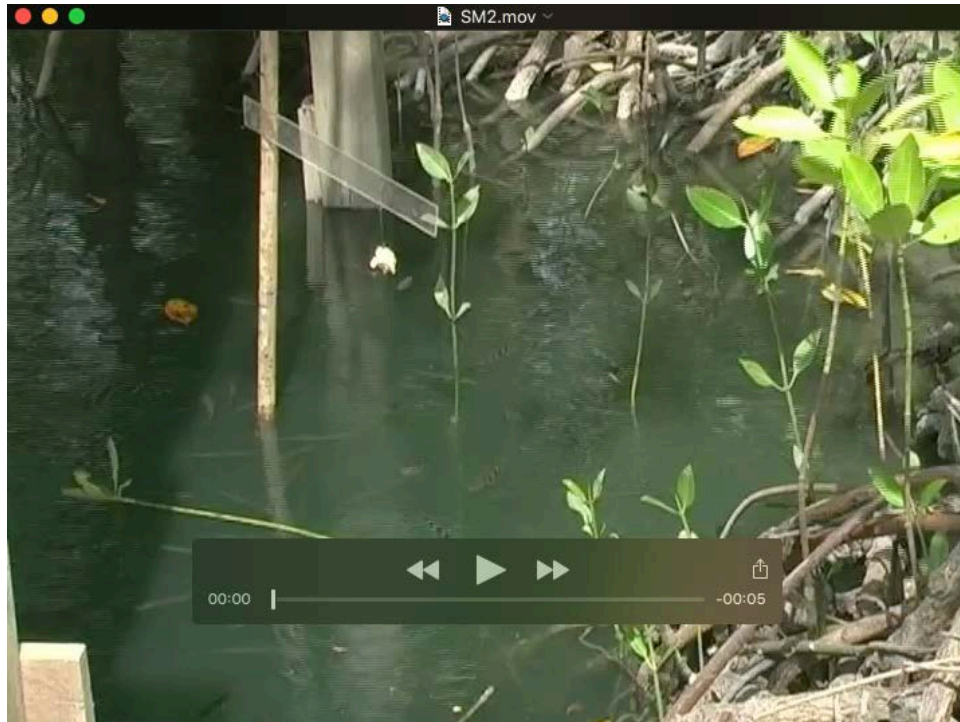

**Movie 2.** Recording showing a shot fired at a target (a piece of bread, 25 cm above water surface) and the subsequent rush (shown in real time) of archerfish and halfbeaks towards the point of catch. The archerfish starts are their typical predictive C-starts. Recording made at study site close to Chumphon, Thailand. (Recording: J. Eysenbach and P. Malz.)
